# Supplementary material
Source: PubMed Central journal article supplement (PMC3177309)
Supplement: supp_138.20.4387_DEV068098FigS2.pdf [file supp_138.20.4387_DEV068098FigS2.pdf]

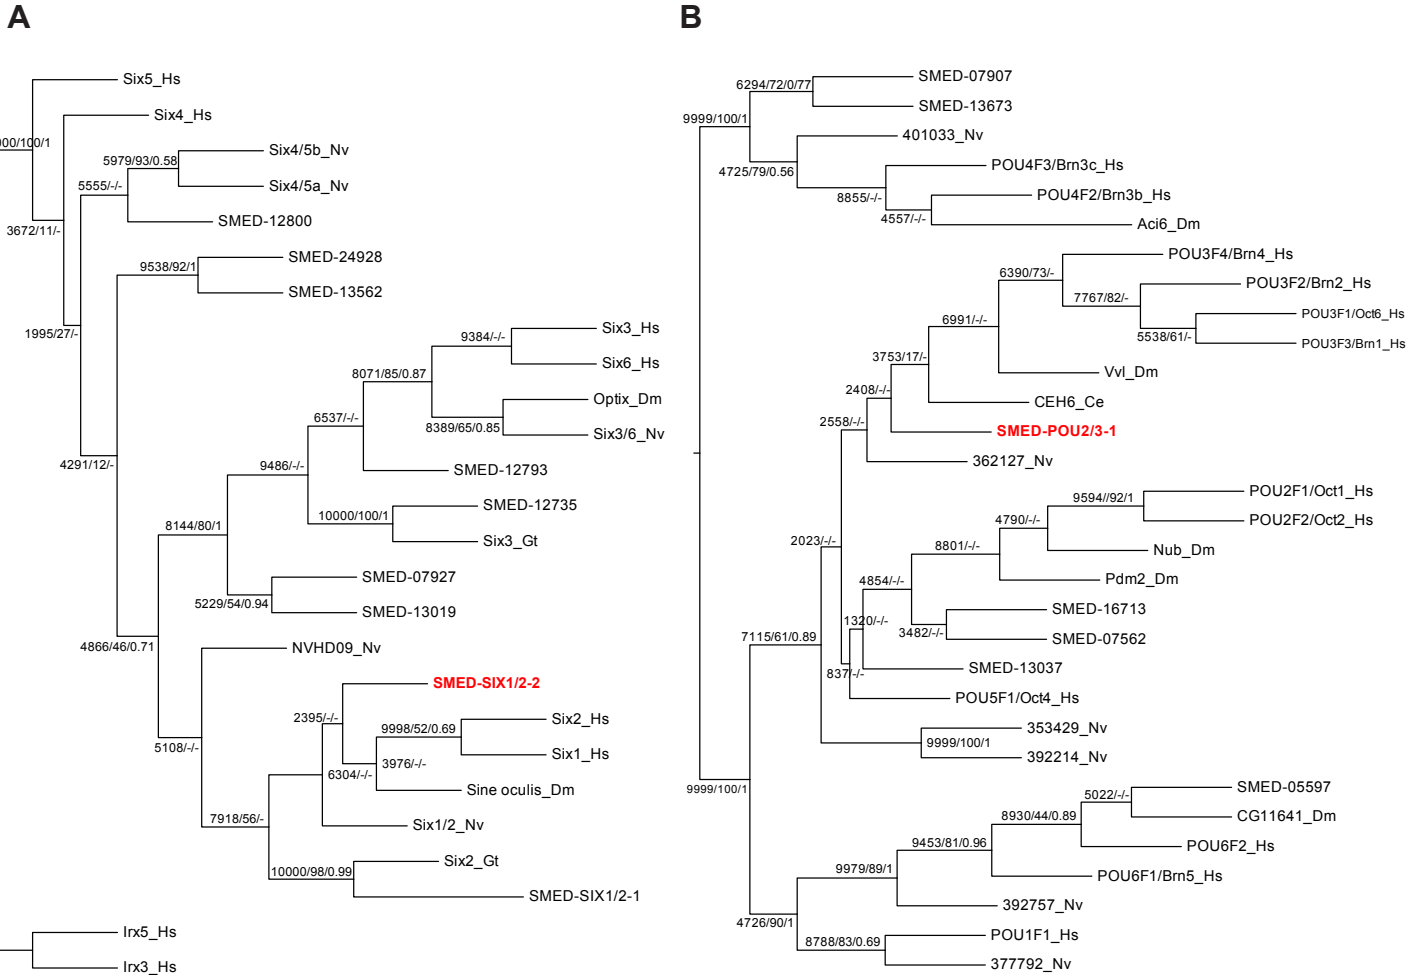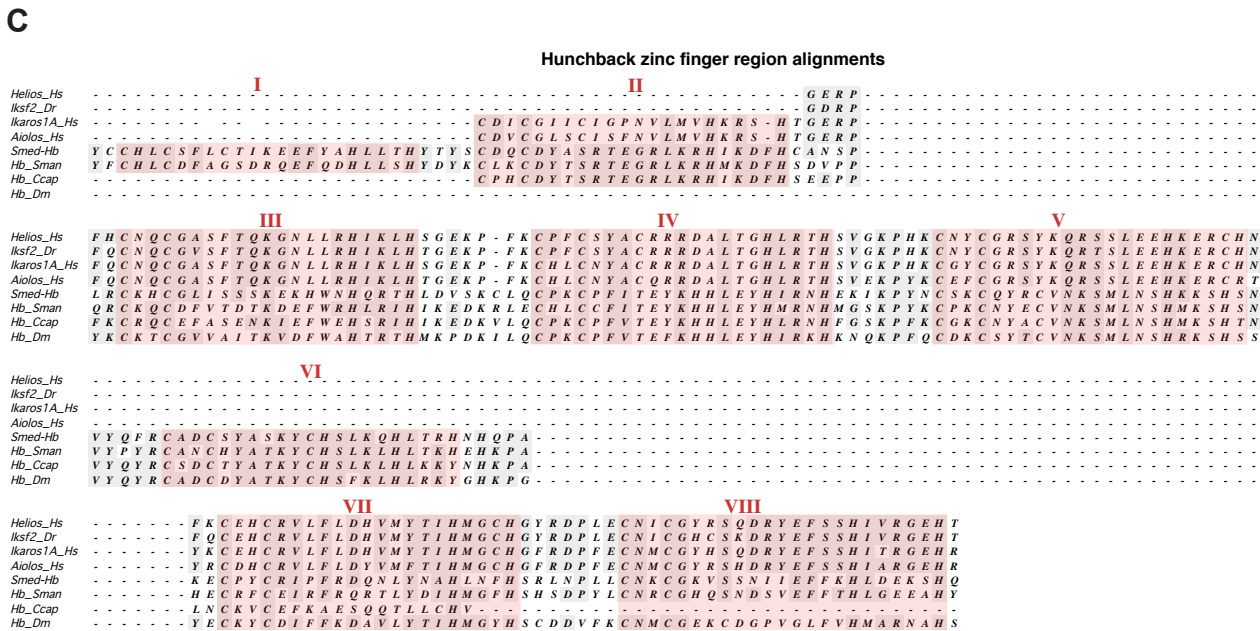

D

Eyes absent family alignment

Eye3\_Hs ERVFLWDLDETIIFHSLLTGYSY - A QKYGKDP TTVVIGSGLTMEEMIFEVADTHLFFNDLE
Eye3\_Dm ERVFLWDLDETLIFHSLLTGYSY - ANRYTKDHS SLMTIAFRMEEMVFNMAADTHFFNFNEIE
Eye2\_Hs ERVFLWDLDETIIFHSLLTGTF - ASRYGKDTTTSVRIGLRMEEMIFNLADTHLFFNDLE
SMEDEya ERIFVWDLDETIIFHSLLTGTY - A QKYQKDA STAVALGLRMEELIFSLADNHMFFNDLEIEPFHVIDQQGHHI Q I I L K S M L R K Y P F D R
Eye1\_Dj ERIFVWDLDETIIFHSLLTGIY - A QRYQKDA STAVALGLRMEELIFSLADNHMFFNDLE
Eye1\_Hs ERVFLWDLDETIIVFHSLLTGSY - ANRYGRDPTTSVSLGLRMEEMIFNLADTHLFFNDLE
Eye4\_Hs ERVFLWDLDETIIVFHSLLTGSY - A QKYGKDP PMAVTLGLRMEEMIFNLADTHLFFNDLE
Eye3\_Hs ECDQVHEDVSDDDNGQDLSNYSFSTDFGSGSGSGS - - - - - HGSS - - VGVQGGVDWMR
Eye3\_Dm ECDQVHEDVSDDDNGQDLSNYSFSTDFGSGSGSGS - - - - - LCLP - - TGVRRGGVDWMR
Eye2\_Hs ECDQVHEDVSDDDNGQDLSNYSFSTDFGSGSGSGS - - - - - LCLG - - SGVHGGVDWMR
SMEDEya WKGEKYLQLS QSLIDRVLKRRHYSIRECDQVHEDVSDDDNGQDLSNYSFSTDFGSGSGSGS - - - - - VGVQGGVDWMR
Eye1\_Dj ECDQVHEDVSDDDNGQDLSNYSFSTDFGSGSGSGS - - - - - LCLP - - TGVRRGGVDWMR
Eye1\_Hs ECDQVHEDVSDDDNGQDLSNYSFSTDFGSGSGSGS - - - - - LCLA - - TGVRRGGVDWMR
Eye4\_Hs ECDQVHEDVSDDDNGQDLSNYSFSTDFGSGSGSGS - - - - - LCLP - - TGVRRGGVDWMR
Eye3\_Hs KLAFRYRKVREIYDKHKS NVGGLLSPQRKEALQRLRAEIEVLTDSWLG TALKS LLLI QSRKNCVNVLI TTTQLVPALAKVLLYGLGEIFP
Eye3\_Dm KLAFRYRKIKDIYNSYRGNVGTLLGPGKREAWLQIRSEIEVATDNWATLALKCLSMISQRENCVNVLVSTSTQLAPALAKVLLYGLGGIFN
Eye2\_Hs KLAFRYRRYKEMYNNTYKNNVGGLLIGTPKRETWLQLRAELEALTDLWLTHSLKALNLSRPN CVNVLVSTTTQLIPALAKVLLYGLGGVFP
SMEDEya KLAFRYRRYKELYNSYRNNVGGLLGTQKREHWLQLRQDIETLDNWLTLAKALTLISQRNCCVNVLVSTTTQLVPALAKVLLYGLGGVFP
Eye1\_Dj KLAFRYRRYKELYNSYRNNVGGLLGTQKREHWLQLRQDIETLDNWLTLAKALTLISQRNCCVNVLVSTTTQLVPALAKVLLYGLGGVFP
Eye1\_Hs KLAFRYRRYKELYNTYKNNVGGLLGPAKREAWLQLRAEIEALTDSWLTLAKALSLSIHSRTNCVNLVSTTTQLIPALAKVLLYGLGIVFP
Eye4\_Hs KLAFRYRRYKELYNTYKNNVGGLLGPAKRDRAWLQLRAEIEGLTDSWLTNALKSLSLSIISTRNCCVNLVSTTTQLIPALAKVLLYSLGGAFP
Eye3\_Hs IENIYSATKIGKESCFERIVSRFGKKTYYVYVIGDGRDEEIAAKQHNMPFWRITNHGDVLSLHQALELDFL - - - - -
Eye3\_Dm IENIYSAHKIGHETCYERIVTRFGRKSTYYVYVIGDGNEEETAAKAMNPPFWRISAHSDIRALYALDMGFL - - - - -
Eye2\_Hs IENIYSATKIGKESCFERIMQRFGRKAVYVYVIGDGVVEEQGAKKHNMPFWRISCHADLEALRHAELELEYL - - - - -
SMEDEya IENIYSANKIGKESCFERISSRFGRKSTYYVYVIGDGKDEETAARQVSWPFWRISHSDIVALHHALESGLYLLHF AFFYSFEINTTCFN
Eye1\_Dj IENIYSANKIGKESCFERISSRFGRKSTYYVYVIGDGKDEETAARQVSWPFWRISHSDIVALHHALESGLYLL - - - - -
Eye1\_Hs IENIYSATKIGKESCFERIQRFGRKVVYVYVIGDGVVEEQGAKKHAMPPFWRISHSDLMAHHALELEYL - - - - -
Eye4\_Hs IENIYSATKIGKESCFERIMQRFGRKVVYVYVIGDGVVEEQGAKKHNMPFWRISHSDDLALHQALELEYL - - - - -

E

Sal-like zinc finger region alignment

Sem4\_Ce I II
Smed-Sall
Salm\_Dm PFFKHKRCRYCGKVFSGDSALQIHIRSH TGERPFFKCNVCGSRFTTKGNLKVHFQRHAKQFPHPVPMNATPIPEH
Salm\_Dm EIFFKHKRCYCGKIFGYSALQIHLRSH TGERPFFKCNVCGSKFTTKGNLKVHYQRHTQIFPPMLLPFGVAPNV
Sall2\_Hs PGGRHKRCFCAKVFSGDSALQIHLRSH TGERPFFKCNVCGNRFTTRGNLKVHFHRRHREKYPHVQMNPHVPPEH
Sall4\_Hs ALYKHKCR - - - - - SSLPSTFIIRAPPTTYVK
Sall1\_Hs AFFKHKRCFCAKVFSGDSALQIHLRSH TGERPFFKCNICGNRFSTKGNLKVHFQRHKEKYPHIQMNFPVPEH
Sall3\_Hs PFFKHKRCFCAKVFSGDSALQIHLRSH TGERPFFKCNICGNRFSTKGNLKVHFQRHKEKYPHIQMNFPVPEH
Sem4\_Ce III IV V
Smed-Sall TTDPNQCILCRRVLSCKSALQMHYRTH TGERPFFKCKICGRAFTTKGNLKTTHMGVHRSKHSFRGLPISLPPQLAAMHQHQIAPPQRIHII
Salm\_Dm RTRPNVCGVVINI - KXSALTMHYRVHTERPFVCTVCEKRFSTKGNLKTHLGQH - - - - -
Salm\_Dm ISDPNQCIVVCDRVLSCKSALQMHYRTH TGERPFFKCKICGRAFTTKGNLKTTHMAVHKIRPPMR - - - NFHQCPVCHKKYSNALVYLQQHIRLH
Sall2\_Hs LTPDNQCIFCQKVMSCRSLLQMHIRTHTGERPFFKCKICGRAFAFKGNLKAHMSIHKIKPPMR - - - SQFKCPVCHQKFSNGIILQQHIRLH
Sall4\_Hs SSGPNQCIVICLRVLSCPRALRLHYGQHGGERPFFKCKVCGRAFSTRGNLRAHFVGHKASPAAR - - - AQNSCPICQKKFTNAVTLQQHVRMH
Sall1\_Hs FVGPSS - - - - -
Sall3\_Hs ATDPNECIIICHRVLSQSALKMHYRTH TGERPFFKCKICGRAFTTKGNLKTTHSYVHRAMPPLR - - - VQHS CPICQKKFTNAVYLQQHIRMH
Sall3\_Hs MTDPNQCIVICHRVLSQSALKMHYRTH TGERPFFKCKICGRAFTTKGNLKTTHFVHRAKPPLR - - - VQHS CPICQKKFTNAVYLQQHIRMH
Sem4\_Ce VI VII VIII
Smed-Sall QQCPICQQRFLNAGELAVHITTEHRN - - - - -
Salm\_Dm PNV CNLCFKMLPSLAALESHLQSEHAKEP - - - - -
Salm\_Dm - - - - -
Sall2\_Hs - - - - -
Sall4\_Hs - - - - -
Sall1\_Hs NTA CDICGKTFACQSALDIHYRSH TKERPFVICTVCNRFSTKGNLKHMLTHQ - - - - -
Sall3\_Hs STVCGVCGKPFACQSALEIHYRSH TKERPFVICALCRRGCSTMGNLKHMLLTHR - - - - -
Sem4\_Ce IX X
Smed-Sall SKHQCGVCFKHFSSSALQIHMRTHTGDKP - FKCDMCGRAFTTRGNLKVHMGTHSWQSPSRRGRR - - - - -
Salm\_Dm DSNICICRQSFQSKFALELHFRVHTGGKE - - - - -
Salm\_Dm GSTTCGICYKTFPCHSALEIHYRSH TKERP - FKCSDICDRGFTTKGNLKHMLTH - - - - -
Sall2\_Hs NKHFCHVCRNRFSSSALQIHMRTHTGDKP - FQCNVCQKAFSTKGNLKVHMGTHMWTNPTSRGRR - - - - -
Sall4\_Hs SRKACEVCGQAFPSQAALAEHQTHPKEGPLF - FVCNFCGRAFTTKGNLKVHMGTHMWTNPTSRGRR - - - - -
Sall1\_Hs KQHGTTCRCGKNFSSSALQIHERTH TGEKP - FVACNFCGRAFTTKGNLKVHMGTHMWTNPTSRGRR - - - - -
Sall3\_Hs KQHGTTCRCGKTFSSSALQIHERTH TGEKP - FQCTICGRAFTTKGNLKVHMGTHMWTNPTSRGRR - - - - -
Sem4\_Ce XI
Smed-Sall TVCSYCKVCSQSPNELEQLKEHLN - - - - -
Salm\_Dm - - - - -
Salm\_Dm - - - - -
Sall2\_Hs - - - - -
Sall4\_Hs - - - - -
Sall1\_Hs - - - - -
Sall3\_Hs - - - - -

F

Odd skipped related (Osr) zinc finger region alignment

Smed-Osr I II III
Osr1\_Hs KKLKSTRGXGRXKKEYICRFCHRHFTKSYNLLIHERTH TDERPFFCDICGKAFFRR - - IYETTIIHSL - - - - -
Osr1\_Hs KKPTRGRLPSTKKEFVCKFCGRHFTKSYNLLIHERTH TDERPPTCDICGKAFFRRQDHLRDHRYIHSKEKPFK CQECGKGFCSRTLAVHKTLHSQVKELKTS
Osr1\_Hs P SGATGSSRPKQFICRYCNRFQFTKSYNLLIHERTH TDERPYSCDICGKAFFRRQDHLRDHRYIHSKDKPFK CSDCGKGFCSRTLAVHKVTHLEEGPHKCP

Figure S2 continued
