# Supplementary material
Source: PubMed Central journal article supplement (PMC3177309)
Supplement: supp_138.20.4387_DEV068098TableS1.pdf [file supp_138.20.4387_DEV068098TableS1.pdf]

**Supplemental Table 1:**  
**Genes that are significantly downregulated following *Six1/2-2* RNAi**

| gene ID       | Gene name/Blast to human                                                       | Fold change      |                    |
|---------------|--------------------------------------------------------------------------------|------------------|--------------------|
|               |                                                                                | <i>Six1/2</i> d8 | <i>Six 1/2</i> d15 |
| SMED_06225_V2 | POU class 3 homeobox 3 [Homo sapiens];NP_006227                                | -1.96            | -2.73              |
| SMED_20428_V2 | POU domain, class 3, transcription factor 1 [Homo sapiens];NP_002690           | -1.72            | -2.05              |
| SMED_06225_V2 | POU class 3 homeobox 3 [Homo sapiens];NP_006227                                | -1.63            | -2.22              |
| SMED_20428_V2 | POU domain, class 3, transcription factor 1 [Homo sapiens];NP_002690           | -1.48            | -1.64              |
| SMED_08876_V2 | placental alkaline phosphatase preproprotein [Homo sapiens];NP_001623          | -1.43            | -2.52              |
| SMED_11465_V2 | placental alkaline phosphatase preproprotein [Homo sapiens];NP_001623          | -1.34            | -2.22              |
| SMED_26293_V2 | quaking homolog, KH domain RNA binding isoform HQK-7B [Homo sapiens];NP_996737 | -1.22            | -1.65              |
| SMED_07082_V2 | furry-like [Homo sapiens];NP_055845                                            | -1.19            | -2.96              |
| SMED_13636_V2 | L-plastin [Homo sapiens];NP_002289                                             | -1.13            | -3.14              |
| SMED_06184_V2 | PREDICTED: hypothetical protein, partial [Homo sapiens];XP_001716140           | -1.12            | -2.18              |
| SMED_02296_V2 | coatomer protein complex, subunit alpha isoform 2 [Homo sapiens];NP_004362     | -1.10            | -1.41              |
| SMED_21809_V2 | cubilin precursor [Homo sapiens];NP_001072                                     | -0.90            | -2.78              |
| SMED_08788_V2 | sodium/hydrogen exchanger regulatory factor 1 [Homo sapiens];NP_004243         | -0.85            | -1.57              |
| SMED_28523_V2 | synaptotagmin I [Homo sapiens];NP_001129278                                    | -0.83            | -1.70              |
| SMED_29161_V2 | cubilin precursor [Homo sapiens];NP_001072                                     | -0.82            | -2.53              |
| SMED_37386_V2 | Down syndrome critical region protein 3 [Homo sapiens];NP_006043               | -0.81            | -0.54              |
| SMED_29213_V2 | placental alkaline phosphatase preproprotein [Homo sapiens];NP_001623          | -0.77            | -1.00              |
| SMED_10365_V2 | CD9 antigen [Homo sapiens];NP_001760                                           | -0.76            | -1.91              |
| SMED_29212_V2 | placental alkaline phosphatase preproprotein [Homo sapiens];NP_001623          | -0.66            | -0.87              |
| SMED_04194_V2 | carbonic anhydrase XIII [Homo sapiens];NP_940986                               | -0.66            | -1.09              |
| SMED_28174_V2 | sal-like 1 isoform a [Homo sapiens];NP_002959                                  | -0.65            | -1.13              |
| SMED_22190_V2 | LSM14 homolog B [Homo sapiens];NP_653304                                       | -0.65            | -0.53              |
| SMED_28916_V2 | solute carrier family 6 member 9 isoform 1 [Homo sapiens];NP_008865            | -0.64            | -0.62              |
| SMED_07082_V2 | furry-like [Homo sapiens];NP_055845                                            | -0.61            | -1.00              |
| SMED_02759_V2 | ring finger protein 167 precursor [Homo sapiens];NP_056343                     | -0.61            | -1.03              |
| SMED_26752_V2 | carbonic anhydrase XIV precursor [Homo sapiens];NP_036245                      | -0.60            | -1.57              |

|               |                                                                                                              |       |       |
|---------------|--------------------------------------------------------------------------------------------------------------|-------|-------|
| SMED_11393_V2 | acid sphingomyelinase-like phosphodiesterase 3B isoform 1 [Homo sapiens];NP_055289                           | -0.58 | -0.59 |
| SMED_11796_V2 | tRNA-yW synthesizing protein 3 homolog isoform 1 [Homo sapiens];NP_612476                                    | -0.57 | -0.33 |
| SMED_36970_V2 | ankyrin repeat domain 28 [Homo sapiens];NP_056014                                                            | -0.56 | -0.45 |
| SMED_00684_V2 | carbonic anhydrase VII isoform 1 [Homo sapiens];NP_005173                                                    | -0.51 | -1.72 |
| SMED_08765_V2 | SH3 and multiple ankyrin repeat domains 3 [Homo sapiens];NP_001073889                                        | -0.50 | -0.44 |
| SMED_34595_V2 | carbonic anhydrase VII isoform 2 [Homo sapiens];NP_001014435                                                 | -0.50 | -1.67 |
| SMED_08027_V2 | core 1 synthase, glycoprotein-N-acetylgalactosamine 3-beta-galactosyltransferase, 1 [Homo sapiens];NP_064541 | -0.49 | -0.31 |
| SMED_14080_V2 | mucolipin 1 [Homo sapiens];NP_065394                                                                         | -0.49 | -0.59 |
| SMED_33441_V2 | nucleoporin 98kD isoform 3 [Homo sapiens];NP_005378                                                          | -0.47 | -0.31 |
| SMED_16612_V2 | ATPase type 13A3 [Homo sapiens];NP_078800                                                                    | -0.47 | -0.51 |
| SMED_27699_V2 | alpha 2 type V collagen preproprotein [Homo sapiens];NP_000384                                               | -0.46 | -0.62 |
| SMED_09982_V2 | solute carrier family 22 member 5 [Homo sapiens];NP_003051                                                   | -0.46 | -0.32 |
| SMED_24789_V2 | solute carrier family 6 member 9 isoform 1 [Homo sapiens];NP_008865                                          | -0.46 | -1.74 |
| SMED_06502_V2 | solute carrier family 6 member 2 [Homo sapiens];NP_001034                                                    | -0.46 | -1.75 |
| SMED_25974_V2 | alpha 2 type VI collagen isoform 2C2a precursor [Homo sapiens];NP_478054                                     | -0.46 | -0.44 |
| SMED_29162_V2 | cubilin precursor [Homo sapiens];NP_001072                                                                   | -0.44 | -1.03 |
| SMED_10860_V2 | solute carrier family 5 (sodium/glucose cotransporter), member 12 [Homo sapiens];NP_848593                   | -0.43 | -1.04 |
| SMED_04762_V2 | transmembrane protein 41B isoform 1 [Homo sapiens];NP_055827                                                 | -0.43 | 0.32  |
| SMED_11095_V2 | alpha 1 type XI collagen isoform B preproprotein [Homo sapiens];NP_542196                                    | -0.43 | -0.44 |
| SMED_05639_V2 | stomatin isoform a [Homo sapiens];NP_004090                                                                  | -0.42 | -0.28 |
| SMED_02635_V2 | radial spoke head 9 homolog [Homo sapiens];NP_689945                                                         | -0.42 | -0.24 |
| SMED_10505_V2 | transmembrane protein 195 [Homo sapiens];NP_001004320                                                        | -0.42 | -0.55 |
| SMED_06225_V2 | POU class 3 homeobox 3 [Homo sapiens];NP_006227                                                              | -0.41 | -0.32 |
| SMED_01717_V2 | solute carrier family 25 member 24 isoform 1 [Homo sapiens];NP_037518                                        | -0.41 | 0.36  |
| SMED_28962_V2 | ankyrin 2 isoform 3 [Homo sapiens];NP_001120965                                                              | -0.40 | -1.41 |

|               |                                                                                                                 |       |       |
|---------------|-----------------------------------------------------------------------------------------------------------------|-------|-------|
| SMED_35047_V2 | phosphofructokinase, muscle isoform 2 [Homo sapiens];NP_001160160                                               | -0.40 | -0.17 |
| SMED_23889_V2 | solute carrier family 6 (amino acid transporter), member 14 [Homo sapiens];NP_009162                            | -0.40 | -0.87 |
| SMED_10615_V2 | acyl-CoA synthetase short-chain family member 3 precursor [Homo sapiens];NP_078836                              | -0.40 | -0.57 |
| SMED_01311_V2 | calponin-homology and microtubule-associated protein [Homo sapiens];NP_056232                                   | -0.40 | 0.23  |
| SMED_10830_V2 | tetraspan 1 [Homo sapiens];NP_005718                                                                            | -0.40 | -1.94 |
| SMED_03089_V2 | cholinergic receptor, nicotinic, alpha polypeptide 2 (neuronal) precursor [Homo sapiens];NP_000733              | -0.39 | 0.19  |
| SMED_03222_V2 | Bardet-Biedl syndrome 1 [Homo sapiens];NP_078925                                                                | -0.39 | -0.46 |
| SMED_03037_V2 | GTF2I repeat domain containing 2 [Homo sapiens];NP_775808                                                       | -0.39 | -0.44 |
| SMED_26189_V2 | trinucleotide repeat containing 18 [Homo sapiens];NP_001073964                                                  | -0.39 | 0.18  |
| SMED_25147_V2 | PREDICTED: hypothetical protein [Homo sapiens];XP_001715638                                                     | -0.38 | -0.37 |
| SMED_00417_V2 | outer dense fiber of sperm tails 3 [Homo sapiens];NP_444510                                                     | -0.38 | -0.32 |
| SMED_09130_V2 | solute carrier family 6 (neurotransmitter transporter, taurine), member 6 isoform a [Homo sapiens];NP_001127839 | -0.37 | -0.24 |
| SMED_13064_V2 | S-adenosylhomocysteine hydrolase-like 2 isoform d [Homo sapiens];NP_001124195                                   | -0.37 | -0.44 |
| SMED_10137_V2 | myeloid/lymphoid or mixed-lineage leukemia 3 [Homo sapiens];NP_733751                                           | -0.37 | 0.23  |
| SMED_04486_V2 | cytochrome P450, family 2, subfamily B, polypeptide 6 [Homo sapiens];NP_000758                                  | -0.37 | -0.49 |
| SMED_32500_V2 | solute carrier family 24 member 6 precursor [Homo sapiens];NP_079235                                            | -0.37 | -0.78 |
| SMED_01669_V2 | solute carrier family 6 (amino acid transporter), member 14 [Homo sapiens];NP_009162                            | -0.37 | -1.00 |
| SMED_01973_V2 | serine palmitoyltransferase, long chain base subunit 2 [Homo sapiens];NP_004854                                 | -0.37 | -0.46 |
| SMED_04310_V2 | methyltransferase like 6 [Homo sapiens];NP_689609                                                               | -0.36 | -0.21 |
| SMED_00562_V2 | calcium/calmodulin-dependent serine protein kinase isoform 3 [Homo sapiens];NP_001119527                        | -0.36 | -0.27 |
| SMED_02471_V2 | solute carrier family 5 (inositol transporters), member 3 [Homo sapiens];NP_008864                              | -0.36 | -0.46 |
| SMED_11476_V2 | stomatin isoform b [Homo sapiens];NP_937837                                                                     | -0.36 | -0.38 |
| SMED_27567_V2 | semaphorin 5A precursor [Homo sapiens];NP_003957                                                                | -0.35 | -0.30 |
| SMED_10615_V2 | acyl-CoA synthetase short-chain family member 3 precursor [Homo sapiens];NP_078836                              | -0.35 | -0.22 |

|               |                                                                                                            |       |       |
|---------------|------------------------------------------------------------------------------------------------------------|-------|-------|
| SMED_10795_V2 | S-adenosylhomocysteine hydrolase-like 1 [Homo sapiens];NP_006612                                           | -0.35 | -0.41 |
| SMED_10587_V2 | potassium channel, subfamily K, member 10 isoform 1 [Homo sapiens];NP_066984                               | -0.35 | -0.25 |
| SMED_27922_V2 | membrane protein, palmitoylated 5 [Homo sapiens];NP_071919                                                 | -0.35 | -0.66 |
| SMED_31763_V2 | sphingosine-1-phosphate phosphatase 2 [Homo sapiens];NP_689599                                             | -0.35 | -0.60 |
| SMED_08029_V2 | eukaryotic translation initiation factor 3, subunit 12 [Homo sapiens];NP_037366                            | -0.35 | 0.43  |
| SMED_02292_V2 | aquaporin 4 isoform b [Homo sapiens];NP_004019                                                             | -0.34 | -1.03 |
| SMED_02387_V2 | beta actin [Homo sapiens];NP_001092                                                                        | -0.34 | 0.24  |
| SMED_03121_V2 | Bardet-Biedl syndrome 1 [Homo sapiens];NP_078925                                                           | -0.34 | -0.23 |
| SMED_00758_V2 | CDW92 antigen [Homo sapiens];NP_536856                                                                     | -0.34 | -0.18 |
| SMED_12314_V2 | glutamate receptor, ionotropic, kainate 2 isoform 1 precursor [Homo sapiens];NP_068775                     | -0.34 | -0.47 |
| SMED_00814_V2 | protein arginine methyltransferase 3 isoform 1 [Homo sapiens];NP_005779                                    | -0.34 | 0.22  |
| SMED_10030_V2 | TPTE and PTEN homologous inositol lipid phosphatase isoform gamma [Homo sapiens];NP_954863                 | -0.34 | -0.32 |
| SMED_11332_V2 | calcium channel, alpha 1A subunit isoform 4 [Homo sapiens];NP_001120694                                    | -0.34 | 0.28  |
| SMED_27419_V2 | SMYD family member 5 [Homo sapiens];NP_006053                                                              | -0.34 | -0.23 |
| SMED_28312_V2 | sarcolemma associated protein [Homo sapiens];NP_009090                                                     | -0.34 | -0.42 |
| SMED_22314_V2 | proline-rich protein BstNI subfamily 2 [Homo sapiens];NP_006239                                            | -0.33 | -0.27 |
| SMED_00238_V2 | aryl hydrocarbon receptor interacting protein [Homo sapiens];NP_003968                                     | -0.33 | -0.15 |
| SMED_01362_V2 | fibroblast growth factor receptor 2 isoform 7 precursor [Homo sapiens];NP_001138389                        | -0.33 | -0.44 |
| SMED_28952_V2 | ADAM metallopeptidase with thrombospondin type 1 motif, 2 isoform 1 preproprotein [Homo sapiens];NP_055059 | -0.33 | -1.41 |
| SMED_32946_V2 | secretory carrier membrane protein 2 [Homo sapiens];NP_005688                                              | -0.33 | -0.25 |
| SMED_01775_V2 | protein phosphatase 1, catalytic subunit, alpha isoform 1 [Homo sapiens];NP_002699                         | -0.33 | -0.21 |
| SMED_24260_V2 | frizzled 5 precursor [Homo sapiens];NP_003459                                                              | -0.33 | -1.84 |
| SMED_01773_V2 | REST corepressor 1 [Homo sapiens];NP_055971                                                                | -0.33 | 0.32  |
|               |                                                                                                            |       |       |

**Top 98 oligos that BLAST to a human gene and are significantly ( $p < 0.05$ ) downregulated at day 8 in Six1/2(RNAi) animals relative to control animals**
