# Supplementary material
Source: PubMed Central journal article supplement (PMC3177309)
Supplement: supp_138.20.4387_DEV068098TableS2.pdf [file supp_138.20.4387_DEV068098TableS2.pdf]

**Supplemental Table 2:****Genes that are significantly downregulated following *POU2/3* RNAi**

| gene ID       | Gene name/Blast to human                                                                             | Fold change |            |
|---------------|------------------------------------------------------------------------------------------------------|-------------|------------|
|               |                                                                                                      | POU2/3 d15  | POU2/3 d21 |
| SMED_07082_V2 | furry-like [Homo sapiens];NP_055845                                                                  | -3.84       | -3.68      |
| SMED_13636_V2 | L-plastin [Homo sapiens];NP_002289                                                                   | -3.47       | -3.27      |
| SMED_08876_V2 | placental alkaline phosphatase preproprotein [Homo sapiens];NP_001623                                | -2.75       | -2.38      |
| SMED_24789_V2 | solute carrier family 6 member 9 isoform 1 [Homo sapiens];NP_008865                                  | -2.72       | -2.83      |
| SMED_06502_V2 | solute carrier family 6 member 2 [Homo sapiens];NP_001034                                            | -2.63       | -2.66      |
| SMED_21809_V2 | cubilin precursor [Homo sapiens];NP_001072                                                           | -2.53       | -2.43      |
| SMED_04833_V2 | septin 4 isoform 1 [Homo sapiens];NP_004565                                                          | -2.52       | -2.40      |
| SMED_11465_V2 | placental alkaline phosphatase preproprotein [Homo sapiens];NP_001623                                | -2.52       | -2.23      |
| SMED_10830_V2 | tetraspan 1 [Homo sapiens];NP_005718                                                                 | -2.40       | -2.27      |
| SMED_29161_V2 | cubilin precursor [Homo sapiens];NP_001072                                                           | -2.18       | -2.29      |
| SMED_06184_V2 | PREDICTED: hypothetical protein, partial [Homo sapiens];XP_001716140                                 | -2.17       | -2.35      |
| SMED_30744_V2 | aquaporin 2 [Homo sapiens];NP_000477                                                                 | -2.17       | -1.98      |
| SMED_16975_V2 | dual-specificity tyrosine-(Y)-phosphorylation regulated kinase 1A isoform 4 [Homo sapiens];NP_569121 | -2.15       | -0.34      |
| SMED_20428_V2 | POU domain, class 3, transcription factor 1 [Homo sapiens];NP_002690                                 | -2.03       | -1.92      |
| SMED_06225_V2 | POU class 3 homeobox 3 [Homo sapiens];NP_006227                                                      | -1.98       | -2.00      |
| SMED_28523_V2 | synaptotagmin I [Homo sapiens];NP_001129278                                                          | -1.80       | -1.09      |
| SMED_08988_V2 | NADH dehydrogenase subunit 3 [Homo sapiens];YP_003024033                                             | -1.80       | -1.72      |
| SMED_06225_V2 | POU class 3 homeobox 3 [Homo sapiens];NP_006227                                                      | -1.76       | -1.75      |
| SMED_27916_V2 | exportin 7 isoform b [Homo sapiens];NP_055839                                                        | -1.75       | -1.90      |
| SMED_15856_V2 | solute carrier family 6, member 7 [Homo sapiens];NP_055043                                           | -1.67       | -1.83      |
| SMED_10365_V2 | CD9 antigen [Homo sapiens];NP_001760                                                                 | -1.63       | -1.69      |
| SMED_20428_V2 | POU domain, class 3, transcription factor 1 [Homo sapiens];NP_002690                                 | -1.61       | -1.67      |
| SMED_10401_V2 | solute carrier family 4, sodium bicarbonate transporter-like, member 10 [Homo sapiens];NP_071341     | -1.52       | -1.24      |
| SMED_26293_V2 | quaking homolog, KH domain RNA binding isoform HQK-7B [Homo sapiens];NP_996737                       | -1.49       | -1.62      |
| SMED_07082_V2 | furry-like [Homo sapiens];NP_055845                                                                  | -1.32       | -1.03      |

|               |                                                                                            |       |       |
|---------------|--------------------------------------------------------------------------------------------|-------|-------|
| SMED_29213_V2 | placental alkaline phosphatase preproprotein [Homo sapiens];NP_001623                      | -1.31 | -0.96 |
| SMED_10860_V2 | solute carrier family 5 (sodium/glucose cotransporter), member 12 [Homo sapiens];NP_848593 | -1.30 | -1.43 |
| SMED_28600_V2 | plasminogen isoform 1 precursor [Homo sapiens];NP_000292                                   | -1.29 | -1.53 |
| SMED_03386_V2 | centrosomal protein 290kDa [Homo sapiens];NP_079390                                        | -1.28 | -1.49 |
| SMED_08878_V2 | tubby isoform b [Homo sapiens];NP_813977                                                   | -1.26 | -1.43 |
| SMED_32500_V2 | solute carrier family 24 member 6 precursor [Homo sapiens];NP_079235                       | -1.19 | -1.15 |
| SMED_16073_V2 | otoferlin isoform a [Homo sapiens];NP_919224                                               | -1.18 | -1.17 |
| SMED_37042_V2 | zinc finger protein of the cerebellum 2 [Homo sapiens];NP_009060                           | -1.18 | -1.78 |
| SMED_17044_V2 | lipoxygenase homology domains 1 isoform 1 [Homo sapiens];NP_653213                         | -1.16 | -1.16 |
| SMED_00445_V2 | otoferlin isoform a [Homo sapiens];NP_919224                                               | -1.16 | -1.15 |
| SMED_29162_V2 | cubilin precursor [Homo sapiens];NP_001072                                                 | -1.14 | -1.10 |
| SMED_09768_V2 | GTP cyclohydrolase 1 isoform 1 [Homo sapiens];NP_000152                                    | -1.14 | -1.25 |
| SMED_24041_V2 | itchy homolog E3 ubiquitin protein ligase [Homo sapiens];NP_113671                         | -1.14 | -0.26 |
| SMED_29212_V2 | placental alkaline phosphatase preproprotein [Homo sapiens];NP_001623                      | -1.13 | -0.78 |
| SMED_30734_V2 | 5'-nucleotidase, cytosolic II [Homo sapiens];NP_001127845                                  | -1.13 | -1.00 |
| SMED_02014_V2 | hypothetical protein LOC200765 [Homo sapiens];NP_663748                                    | -1.12 | -0.63 |
| SMED_24209_V2 | erbB-2 isoform a [Homo sapiens];NP_004439                                                  | -1.09 | -0.90 |
| SMED_24209_V2 | erbB-2 isoform a [Homo sapiens];NP_004439                                                  | -1.09 | -0.82 |
| SMED_31446_V2 | alpha 1 type XIII collagen isoform 7 [Homo sapiens];NP_542993                              | -1.09 | -0.98 |
| SMED_21349_V2 | collagen, type XXIV, alpha 1 precursor [Homo sapiens];NP_690850                            | -1.04 | -0.94 |
| SMED_12643_V2 | mucin 2 precursor [Homo sapiens];NP_002448                                                 | -1.03 | -1.59 |
| SMED_16236_V2 | endothelin converting enzyme 2 isoform E [Homo sapiens];NP_001093591                       | -1.03 | -1.32 |
| SMED_14127_V2 | glutaryl-Coenzyme A dehydrogenase isoform a precursor [Homo sapiens];NP_000150             | -1.02 | 0.24  |
| SMED_17077_V2 | protein kinase, cGMP-dependent, type I isoform 1 [Homo sapiens];NP_001091982               | -1.01 | -1.47 |
| SMED_02040_V2 | membrane metallo-endopeptidase [Homo sapiens];NP_009220                                    | -1.01 | -1.31 |
| SMED_01648_V2 | lamin B2 [Homo sapiens];NP_116126                                                          | -1.01 | -1.57 |

|               |                                                                                             |       |       |
|---------------|---------------------------------------------------------------------------------------------|-------|-------|
| SMED_25739_V2 | acyl-CoA synthetase short-chain family member 3 precursor [Homo sapiens];NP_078836          | -1.01 | -0.92 |
| SMED_23669_V2 | protein kinase, cGMP-dependent, type II [Homo sapiens];NP_006250                            | -1.01 | -1.37 |
| SMED_23600_V2 | epidermal growth factor receptor isoform a precursor [Homo sapiens];NP_005219               | -1.00 | -0.82 |
| SMED_05544_V2 | EF-hand calcium binding domain 4B isoform a [Homo sapiens];NP_001138430                     | -0.99 | -0.93 |
| SMED_26752_V2 | carbonic anhydrase XIV precursor [Homo sapiens];NP_036245                                   | -0.97 | -0.99 |
| SMED_23422_V2 | protein tyrosine phosphatase, receptor type, D isoform 2 precursor [Homo sapiens];NP_569075 | -0.96 | -0.86 |
| SMED_25970_V2 | EF-hand calcium binding domain 4A [Homo sapiens];NP_775855                                  | -0.96 | -0.81 |
| SMED_03203_V2 | dynein heavy chain domain 2 isoform 1 [Homo sapiens];NP_848599                              | -0.95 | -1.10 |
| SMED_12105_V2 | dynein, axonemal, heavy polypeptide 6 [Homo sapiens];NP_001361                              | -0.94 | -1.10 |
| SMED_00247_V2 | spectrin, beta, non-erythrocytic 1 isoform 1 [Homo sapiens];NP_003119                       | -0.94 | -1.06 |
| SMED_12807_V2 | heat shock 70kDa protein 1-like [Homo sapiens];NP_005518                                    | -0.93 | -0.91 |
| SMED_03207_V2 | dynein, axonemal, heavy chain 5 [Homo sapiens];NP_001360                                    | -0.92 | -1.23 |
| SMED_07393_V2 | ATP-binding cassette, subfamily B, member 4 isoform C [Homo sapiens];NP_061338              | -0.92 | -0.90 |
| SMED_28174_V2 | sal-like 1 isoform a [Homo sapiens];NP_002959                                               | -0.90 | -0.82 |
| SMED_02296_V2 | coatamer protein complex, subunit alpha isoform 2 [Homo sapiens];NP_004362                  | -0.89 | -1.53 |
| SMED_00693_V2 | PREDICTED: hypothetical protein [Homo sapiens];XP_002344530                                 | -0.89 | -0.88 |
| SMED_07933_V2 | solute carrier family 7, member 2 isoform 2 [Homo sapiens];NP_001008539                     | -0.88 | -0.77 |
| SMED_12239_V2 | transient receptor potential cation channel, subfamily M, member 1 [Homo sapiens];NP_002411 | -0.88 | -1.05 |
| SMED_06872_V2 | membrane metallo-endopeptidase [Homo sapiens];NP_009220                                     | -0.88 | -1.16 |
| SMED_09007_V2 | solute carrier family 5 (sodium/glucose cotransporter), member 11 [Homo sapiens];NP_443176  | -0.88 | -1.39 |
| SMED_23543_V2 | voltage-dependent calcium channel alpha 1G subunit isoform 1 [Homo sapiens];NP_061496       | -0.88 | -0.85 |
| SMED_20206_V2 | pantothenate kinase 4 [Homo sapiens];NP_060686                                              | -0.87 | -1.31 |

|               |                                                                                             |       |       |
|---------------|---------------------------------------------------------------------------------------------|-------|-------|
| SMED_25105_V2 | EF-hand calcium binding domain 4B isoform a [Homo sapiens];NP_001138430                     | -0.87 | -0.83 |
| SMED_37407_V2 | integrin-linked kinase-associated protein phosphatase 2C [Homo sapiens];NP_110395           | -0.87 | -0.76 |
| SMED_05837_V2 | tektin 3 [Homo sapiens];NP_114104                                                           | -0.87 | -1.18 |
| SMED_00285_V2 | coiled-coil domain containing 65 [Homo sapiens];NP_149115                                   | -0.87 | -1.00 |
| SMED_01648_V2 | lamin B2 [Homo sapiens];NP_116126                                                           | -0.86 | -1.40 |
| SMED_09317_V2 | EF-hand calcium binding domain 4B isoform a [Homo sapiens];NP_001138430                     | -0.86 | -0.86 |
| SMED_14365_V2 | asparagine synthetase [Homo sapiens];NP_597680                                              | -0.86 | -1.07 |
| SMED_05811_V2 | ubiquitin-conjugating enzyme E2K isoform 1 [Homo sapiens];NP_005330                         | -0.86 | -1.11 |
| SMED_26600_V2 | tissue factor pathway inhibitor isoform a precursor [Homo sapiens];NP_006278                | -0.85 | -1.19 |
| SMED_24387_V2 | protein tyrosine phosphatase, receptor type, D isoform 2 precursor [Homo sapiens];NP_569075 | -0.85 | -1.21 |
| SMED_22476_V2 | dynein, axonemal, heavy chain 5 [Homo sapiens];NP_001360                                    | -0.85 | -1.13 |
| SMED_25657_V2 | carboxypeptidase 2, cytosolic [Homo sapiens];NP_079059                                      | -0.85 | -0.79 |
| SMED_03224_V2 | PREDICTED: hypothetical protein [Homo sapiens];XP_001126005                                 | -0.85 | -1.06 |
| SMED_26539_V2 | adenylate kinase domain containing 1 isoform 1 [Homo sapiens];NP_001138600                  | -0.85 | -1.03 |
| SMED_00684_V2 | carbonic anhydrase VII isoform 1 [Homo sapiens];NP_005173                                   | -0.84 | -0.95 |
| SMED_02455_V2 | dynein, axonemal, heavy chain 17 [Homo sapiens];NP_775899                                   | -0.84 | -1.15 |
| SMED_24060_V2 | ubiquitin C [Homo sapiens];NP_066289                                                        | -0.84 | -0.53 |
| SMED_08853_V2 | dynein, axonemal, heavy chain 3 [Homo sapiens];NP_060009                                    | -0.84 | -0.89 |
| SMED_01148_V2 | lamin B2 [Homo sapiens];NP_116126                                                           | -0.83 | -1.28 |
| SMED_33756_V2 | ABT1-associated protein [Homo sapiens];NP_057733                                            | -0.83 | -0.71 |
| SMED_22486_V2 | PREDICTED: hypothetical protein [Homo sapiens];XP_002347599                                 | -0.83 | -0.80 |
| SMED_33964_V2 | tektin 1 [Homo sapiens];NP_444515                                                           | -0.83 | -0.61 |
| SMED_11067_V2 | RAB1A, member RAS oncogene family isoform 1 [Homo sapiens];NP_004152                        | -0.82 | -0.89 |
| SMED_07305_V2 | tektin 2 [Homo sapiens];NP_055281                                                           | -0.82 | -1.02 |
| SMED_24415_V2 | collagen, type XXIV, alpha 1 precursor [Homo sapiens];NP_690850                             | -0.82 | -0.76 |
| SMED_01270_V2 | smooth muscle myosin heavy chain 11 isoform SM2B [Homo sapiens];NP_001035202                | -0.82 | -0.92 |

**Top 99 oligos that BLAST to a human gene and are significantly ( $p < 0.05$ ) downregulated at day 15 in POU2/3(RNAi) animals relative to control animals**
