# Supplementary material
Source: PubMed Central journal article supplement (PMC3177309)

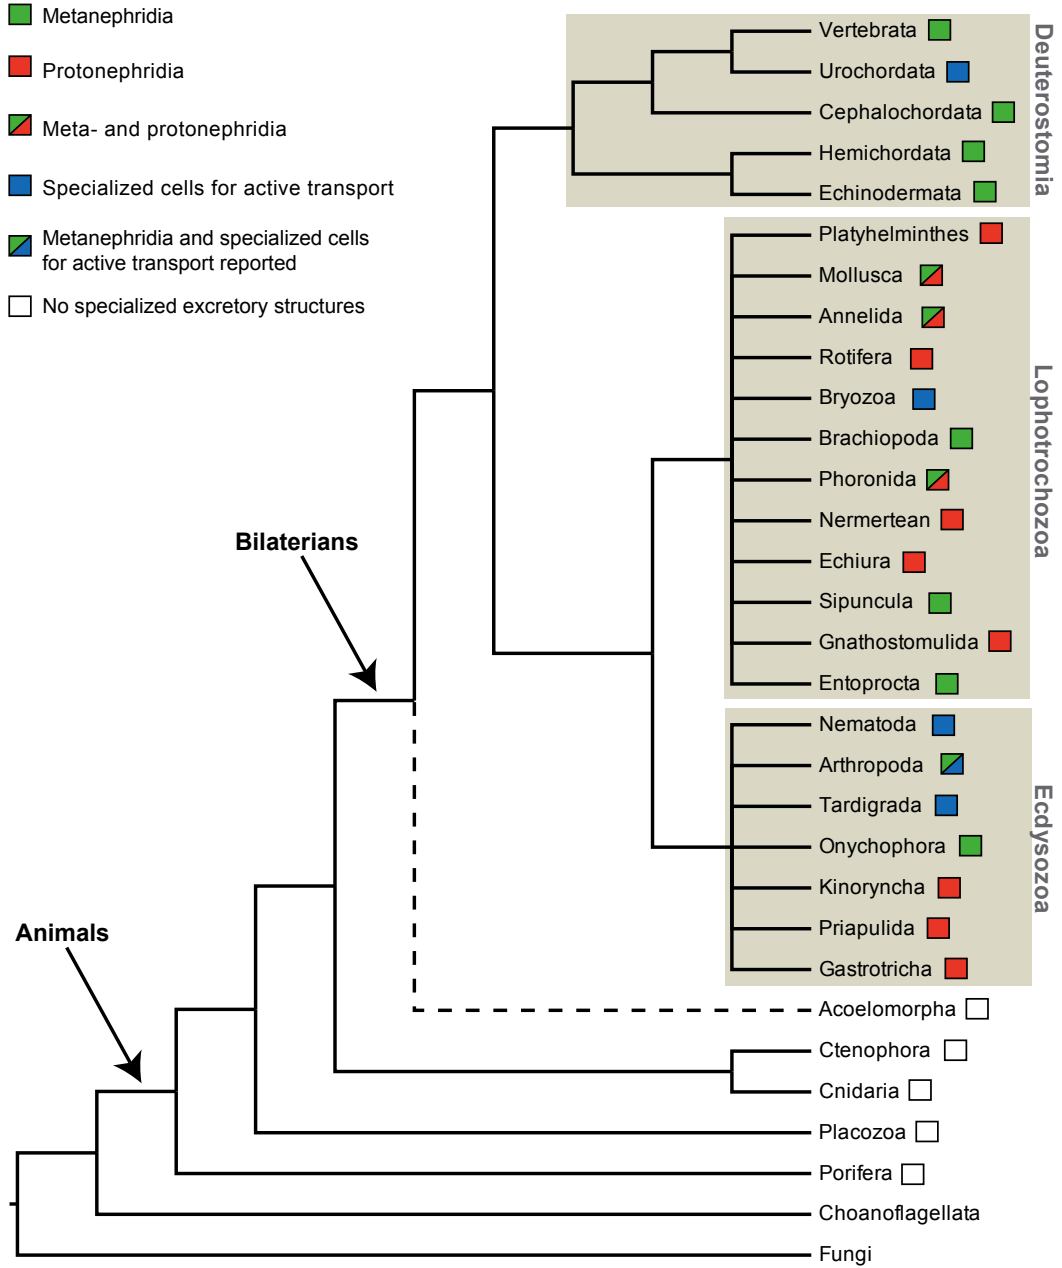

Supplement: supp_138.20.4387_DEV068098FigS1.pdf [file supp_138.20.4387_DEV068098FigS1.pdf]

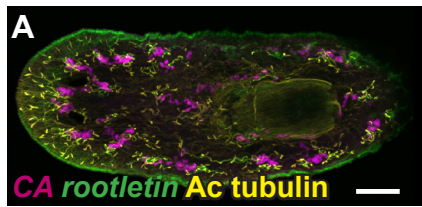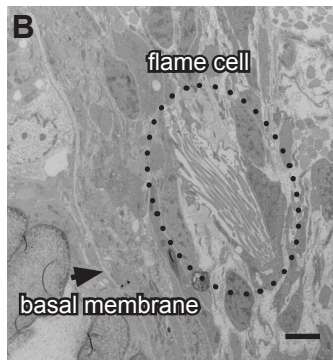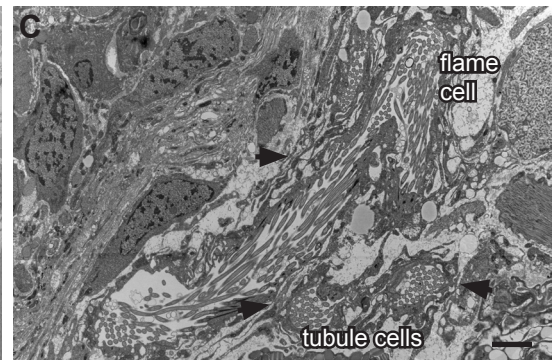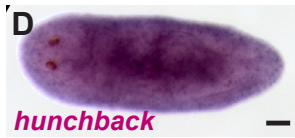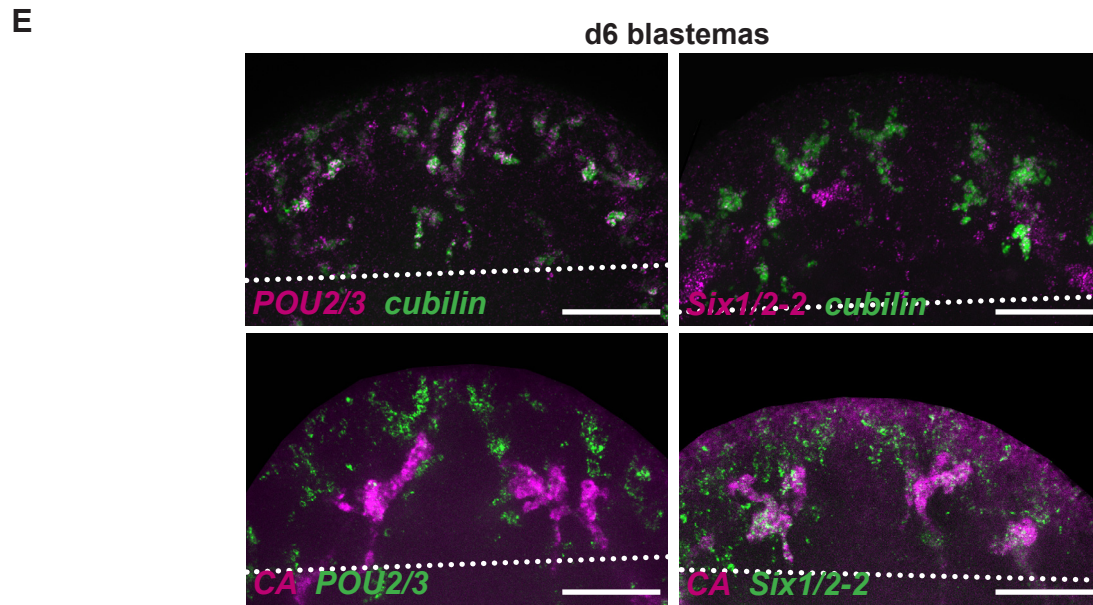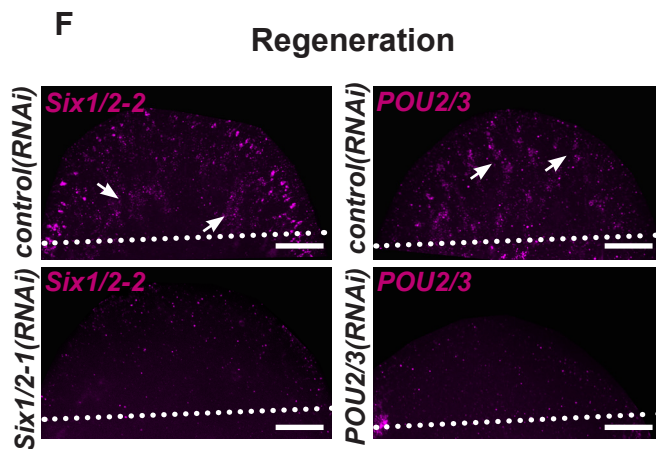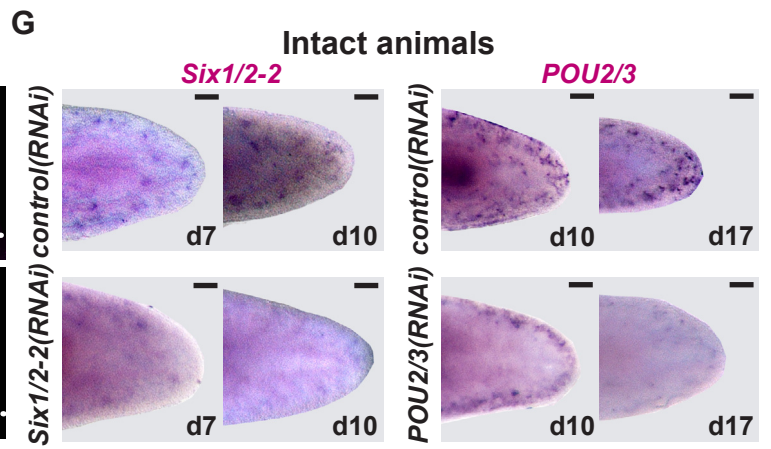

Supplement: supp_138.20.4387_DEV068098FigS3.pdf [file supp_138.20.4387_DEV068098FigS3.pdf]

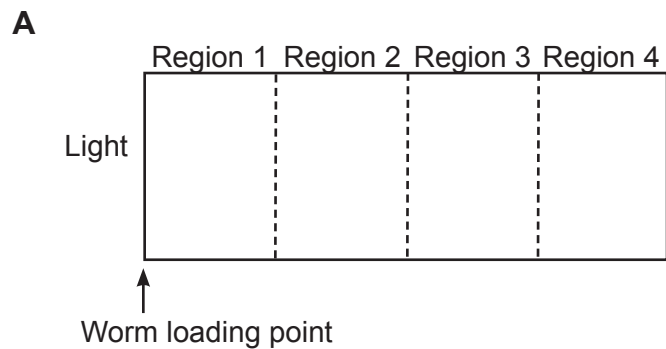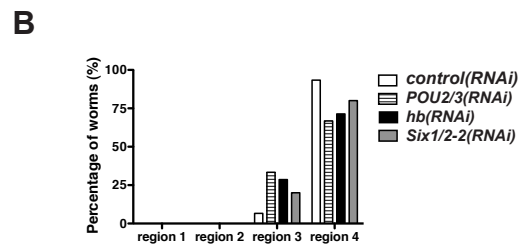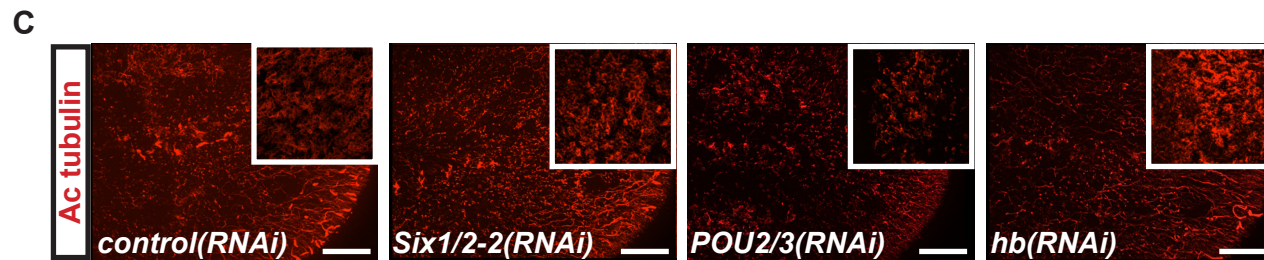

Supplement: supp_138.20.4387_DEV068098FigS4.pdf [file supp_138.20.4387_DEV068098FigS4.pdf]

A

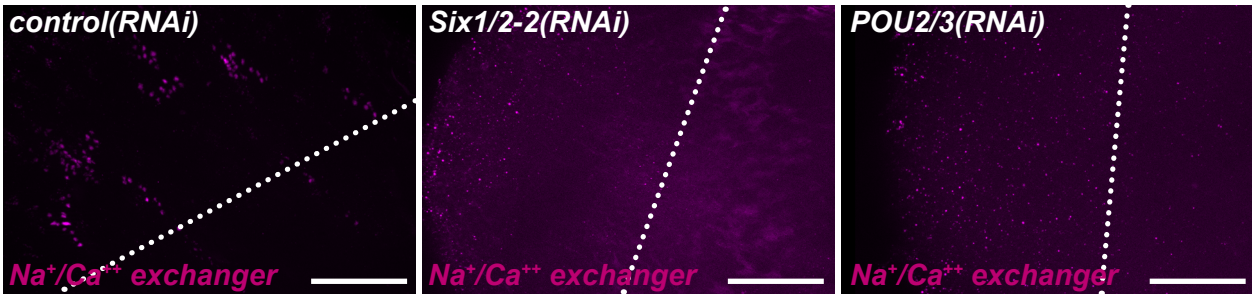

B

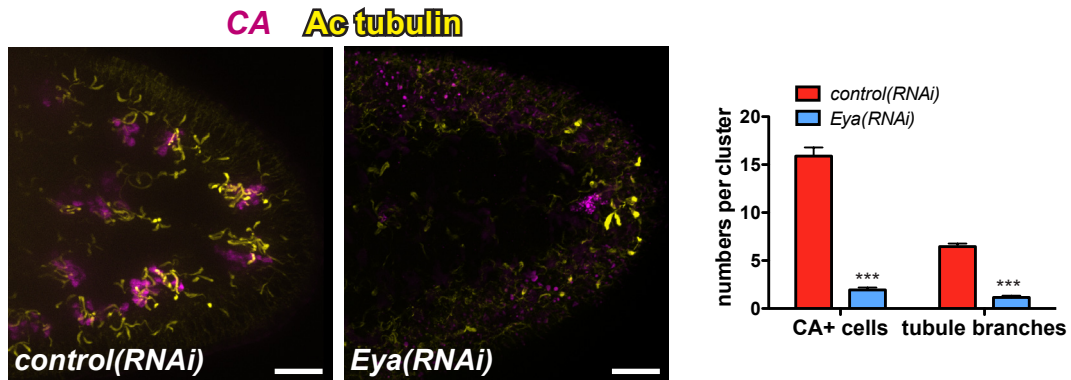

C

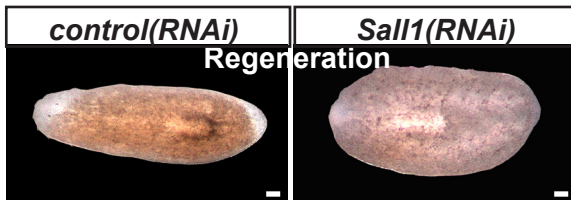

Supplement: supp_138.20.4387_DEV068098FigS5.pdf [file supp_138.20.4387_DEV068098FigS5.pdf]

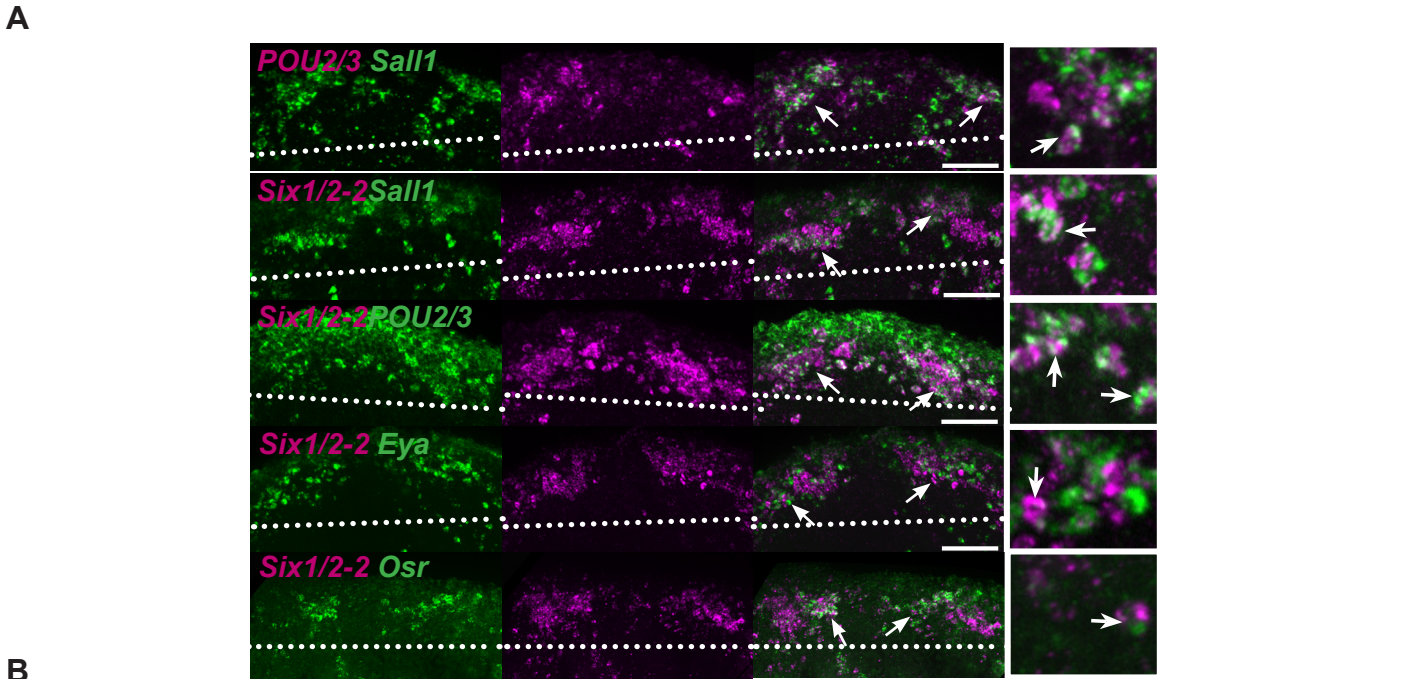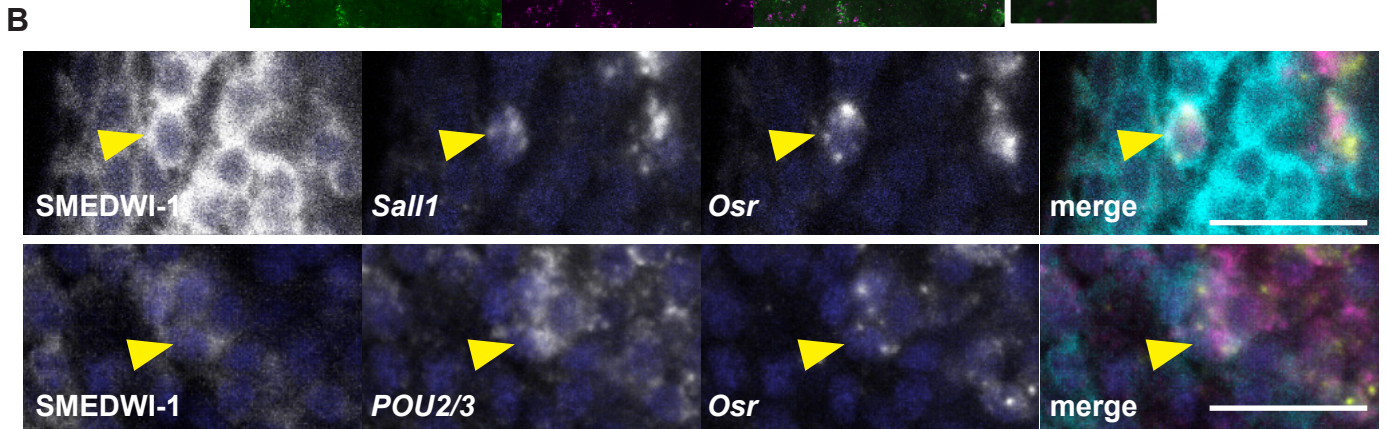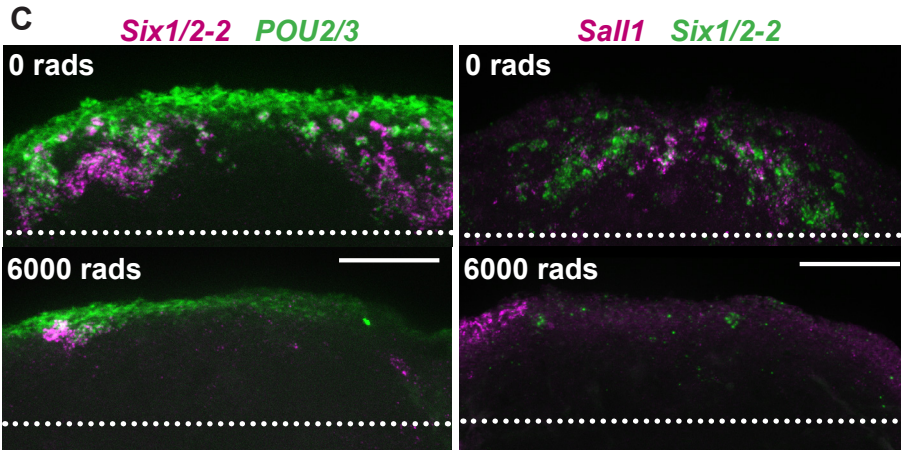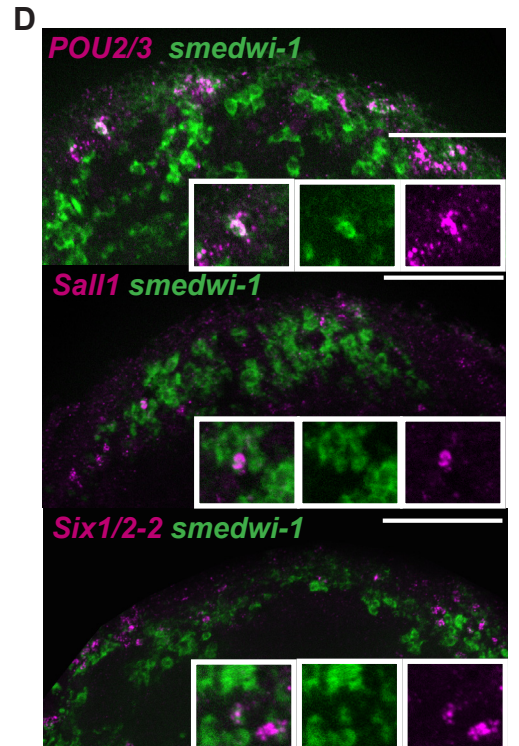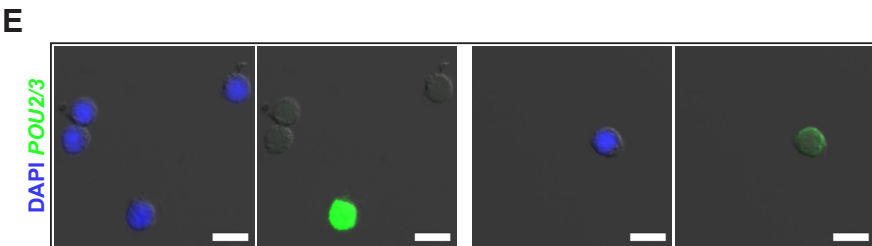

Supplement: supp_138.20.4387_DEV068098FigS6.pdf [file supp_138.20.4387_DEV068098FigS6.pdf]
